# Supplementary material for: Socioeconomic and Engagement Barriers to Cardiovascular Risk Awareness Among Cancer Survivors
Source: Research Square preprint supplement (doi:10.21203/rs.3.rs-8457803/v1), 2026-01-21

**Title:** Socioeconomic and Engagement Barriers to Cardiovascular Risk Awareness Among Cancer Survivors

**Journal Name:** Journal of Cancer Survivorship

**Author List:** Kristine J Hahm, M.P.P.<sup>1\*</sup>, Dohyeong Kim, Ph.D.<sup>1</sup>, Carolyn Smith-Morris, Ph.D., M.S., LPC<sup>2</sup>, Shelia Patterson, M.Ed.<sup>3</sup>, Marisel Ponton, M.S.<sup>2</sup>, Arthur S Hong, M.D., MPH<sup>2,4,5,6</sup>, Lauren Taylor, M.D.<sup>4</sup>, Vlad Zaha, M.D., Ph.D.<sup>4,5</sup>

1. School of Economic, Political and Policy Sciences, University of Texas at Dallas, Richardson, TX.
2. O'Donnell School of Public Health, The University of Texas Southwestern Medical Center, Dallas, TX.
3. Oak Cliff Bible Fellowship and 50 Hoops Legends, Dallas, TX.
4. Department of Internal Medicine, The University of Texas Southwestern Medical Center, Dallas, TX.
5. Harold C Simmons Comprehensive Cancer Center, Dallas, TX.
6. Parkland Health, Dallas, TX

\* Corresponding Author

**Address for Correspondence:**

Kristine J. Hahm

800 West Campbell Rd, GR 31, Richardson, TX 75080

School of Economic, Political & Policy Sciences

University of Texas at Dallas

Email: kristine.hahm@utdallas.edu

**Supplementary Table 1. Simple Descriptive**

| Category     | Variable  | Response                                                | Count | Percentage | Min | Max | Mean  | NA's |
|--------------|-----------|---------------------------------------------------------|-------|------------|-----|-----|-------|------|
| Geographics  | Zip code  |                                                         | 614   |            |     |     |       |      |
| Demographics | Gender    | Female                                                  | 326   | 53.3%      | 1   | 3   | 1.5   | 2    |
|              |           | Male                                                    | 284   | 46.4%      |     |     |       |      |
|              |           | Other gender-Identified                                 | 2     | 0.3%       |     |     |       |      |
|              |           | Do not know/unable to answer                            | 0     | 0%         |     |     |       |      |
|              | Age       | 21 - 30 years old                                       | 46    | 8.0%       | 21  | 91  | 54.29 | 40   |
|              |           | 31 - 40 years old                                       | 112   | 19.5%      |     |     |       |      |
|              |           | 41 - 50 years old                                       | 87    | 15.2%      |     |     |       |      |
|              |           | 51 - 60 years old                                       | 89    | 15.5%      |     |     |       |      |
|              |           | 61 - 70 years old                                       | 125   | 21.8%      |     |     |       |      |
|              |           | 71 - 80 years old                                       | 98    | 17.1%      |     |     |       |      |
|              |           | 81 years or older                                       | 17    | 3.0%       |     |     |       |      |
|              | Race      | White                                                   | 180   | 37.6%      | 1   | 7   | 1.7   | 135  |
|              |           | Black/African American                                  | 285   | 59.5%      |     |     |       |      |
|              |           | Asian                                                   | 6     | 1.3%       |     |     |       |      |
|              |           | American Indian/Alaska Native                           | 4     | 0.8%       |     |     |       |      |
|              |           | Native Hawaiian/Pacific Islander                        | 1     | 0.2%       |     |     |       |      |
|              |           | Other identified                                        | 1     | 0.2%       |     |     |       |      |
|              |           | Do not know/unable to answer                            | 2     | 0.4%       |     |     |       |      |
|              | Education | Elementary or Middle School                             | 5     | 0.8%       | 1   | 7   | 4.9   | 6    |
|              |           | General Education Development (GED)/High School Diploma | 53    | 8.7%       |     |     |       |      |
|              |           | Vocational/Technical School                             | 39    | 6.4%       |     |     |       |      |
|              |           | Community College                                       | 85    | 14.0%      |     |     |       |      |

|               |                                  |                              |     |       |   |    |     |   |
|---------------|----------------------------------|------------------------------|-----|-------|---|----|-----|---|
|               |                                  | College/University (BA, BS)  | 184 | 30.3% |   |    |     |   |
|               |                                  | Graduate Degree              | 239 | 39.3% |   |    |     |   |
|               |                                  | Do not know/unable to answer | 3   | 0.5%  |   |    |     |   |
|               | Income                           | < \$12,999                   | 26  | 4.2%  | 1 | 10 | 5.4 | 0 |
|               |                                  | \$13,000-\$24,999            | 51  | 8.3%  |   |    |     |   |
|               |                                  | \$25,000-44,999              | 67  | 10.9% |   |    |     |   |
|               |                                  | \$45,000-64,999              | 100 | 16.3% |   |    |     |   |
|               |                                  | \$65,000-84,999              | 92  | 15.0% |   |    |     |   |
|               |                                  | \$85,000-104,999             | 74  | 12.1% |   |    |     |   |
|               |                                  | \$105,000-124,000            | 64  | 10.4% |   |    |     |   |
|               |                                  | \$125,000-144,999            | 36  | 5.9%  |   |    |     |   |
|               |                                  | > \$145,000                  | 81  | 13.2% |   |    |     |   |
|               |                                  | Do not know/unable to answer | 23  | 3.7%  |   |    |     |   |
| Accessibility | Primary Care Transportation Time | Less than 15 Minutes         | 95  | 15.5% | 1 | 6  | 2.5 | 0 |
|               |                                  | 15-30 minutes                | 269 | 43.8% |   |    |     |   |
|               |                                  | 30-45 minutes                | 159 | 25.9% |   |    |     |   |
|               |                                  | 45 minutes – 1 hour          | 64  | 10.4% |   |    |     |   |
|               |                                  | More than 1 hour             | 19  | 3.1%  |   |    |     |   |
|               |                                  | Not applicable               | 8   | 1.3%  |   |    |     |   |
|               | Oncology Transportation Time     | Less than 15 Minutes         | 31  | 5.0%  | 1 | 6  | 3   | 0 |
|               |                                  | 15-30 minutes                | 192 | 31.3% |   |    |     |   |
|               |                                  | 30-45 minutes                | 208 | 33.9% |   |    |     |   |
|               |                                  | 45 minutes – 1 hour          | 118 | 19.2% |   |    |     |   |
|               |                                  | More than 1 hour             | 41  | 6.7%  |   |    |     |   |
|               |                                  | Not applicable               | 24  | 3.9%  |   |    |     |   |

|                   |                                            |                                                          |     |       |   |   |       |     |
|-------------------|--------------------------------------------|----------------------------------------------------------|-----|-------|---|---|-------|-----|
|                   | Difficulty in seeing Primary Care Provider | Never                                                    | 219 | 35.9% | 1 | 6 | 2.2   | 4   |
|                   |                                            | Rarely                                                   | 170 | 27.9% |   |   |       |     |
|                   |                                            | Sometimes                                                | 132 | 21.6% |   |   |       |     |
|                   |                                            | Often                                                    | 52  | 8.5%  |   |   |       |     |
|                   |                                            | Always                                                   | 24  | 3.9%  |   |   |       |     |
|                   |                                            | Not applicable                                           | 13  | 2.1%  |   |   |       |     |
|                   | Reliable Transportation                    | Never                                                    | 33  | 5.4%  | 1 | 6 | 4.3   | 3   |
|                   |                                            | Rarely                                                   | 22  | 3.6%  |   |   |       |     |
|                   |                                            | Sometimes                                                | 84  | 13.7% |   |   |       |     |
|                   |                                            | Often                                                    | 78  | 12.8% |   |   |       |     |
|                   |                                            | Always                                                   | 384 | 62.8% |   |   |       |     |
|                   |                                            | Not applicable                                           | 10  | 1.6%  |   |   |       |     |
|                   | Transportation Method                      | Car (self-drive or have someone that you know drive you) | 330 | 74.5% | 1 | 6 | 1.562 | 171 |
|                   |                                            | Uber/Lyft/Zipcar                                         | 51  | 11.5% |   |   |       |     |
|                   |                                            | Bus                                                      | 25  | 5.6%  |   |   |       |     |
|                   |                                            | Train                                                    | 11  | 2.5%  |   |   |       |     |
|                   |                                            | Taxi                                                     | 19  | 4.3%  |   |   |       |     |
|                   |                                            | Other                                                    | 7   | 1.6%  |   |   |       |     |
| Health Conditions | Hypertension                               | Yes                                                      | 389 | 63.4% | 1 | 3 | 1.4   | 0   |
|                   |                                            | No                                                       | 215 | 35.0% |   |   |       |     |
|                   |                                            | I don't know                                             | 10  | 1.6%  |   |   |       |     |
|                   | High Cholesterol                           | Yes                                                      | 325 | 52.9% | 1 | 3 | 1     | 0   |
|                   |                                            | No                                                       | 277 | 45.1% |   |   |       |     |

|                                              |                                                        |                           |     |       |   |      |     |    |
|----------------------------------------------|--------------------------------------------------------|---------------------------|-----|-------|---|------|-----|----|
|                                              | Diabetes                                               | I don't know              | 12  | 2.0%  | 1 | 3    | 1.7 | 0  |
|                                              |                                                        | Yes                       | 169 | 27.5% |   |      |     |    |
|                                              |                                                        | No                        | 437 | 71.2% |   |      |     |    |
|                                              |                                                        | I don't know              | 8   | 1.3%  |   |      |     |    |
|                                              | Smoke                                                  | Yes                       | 229 | 37.3% | 1 | 3    | 2   | 0  |
|                                              |                                                        | No                        | 374 | 60.9% |   |      |     |    |
|                                              |                                                        | I don't know              | 11  | 1.8%  |   |      |     |    |
| Engagement in health checkups                | Visit to Primary Care                                  | Once a year               | 140 | 23.1% | 1 | 5    | 2.3 | 8  |
|                                              |                                                        | Several times a year      | 288 | 47.5% |   |      |     |    |
|                                              |                                                        | Once a month              | 78  | 12.9% |   |      |     |    |
|                                              |                                                        | 2-4 times a month         | 85  | 14.0% |   |      |     |    |
|                                              |                                                        | More than 4 times a month | 15  | 2.5%  |   |      |     |    |
|                                              | Visit to Oncology Doctor                               | Once a year               | 95  | 16.1% | 1 | 5    | 2.5 | 24 |
|                                              |                                                        | Several times a year      | 270 | 45.8% |   |      |     |    |
|                                              |                                                        | Once a month              | 102 | 17.3% |   |      |     |    |
|                                              |                                                        | 2-4 times a month         | 108 | 18.3% |   |      |     |    |
|                                              |                                                        | More than 4 times a month | 15  | 2.5%  |   |      |     |    |
| ASCVD Risk                                   | 10-year ASCVD Risk                                     | Actual %                  | 574 |       | 0 | 73.1 | 9.5 | 40 |
|                                              | Risk Category                                          | Low                       | 311 | 54.2% |   |      |     |    |
|                                              |                                                        | Borderline                | 39  | 6.8%  |   |      |     |    |
|                                              |                                                        | Intermediate              | 131 | 22.8% |   |      |     |    |
|                                              |                                                        | High                      | 93  | 16.2% |   |      |     |    |
| Conversations with your cancer professionals | Awareness of cancer treatments' impact on heart health | Yes                       | 202 | 32.9% | 1 | 3    | 1.9 | 0  |
|                                              |                                                        | Non-Yes                   | 412 | 67.1% |   |      |     |    |

Supplementary Figure 1. Density Plot and Histogram of ASCVD 10-Year Risk Category

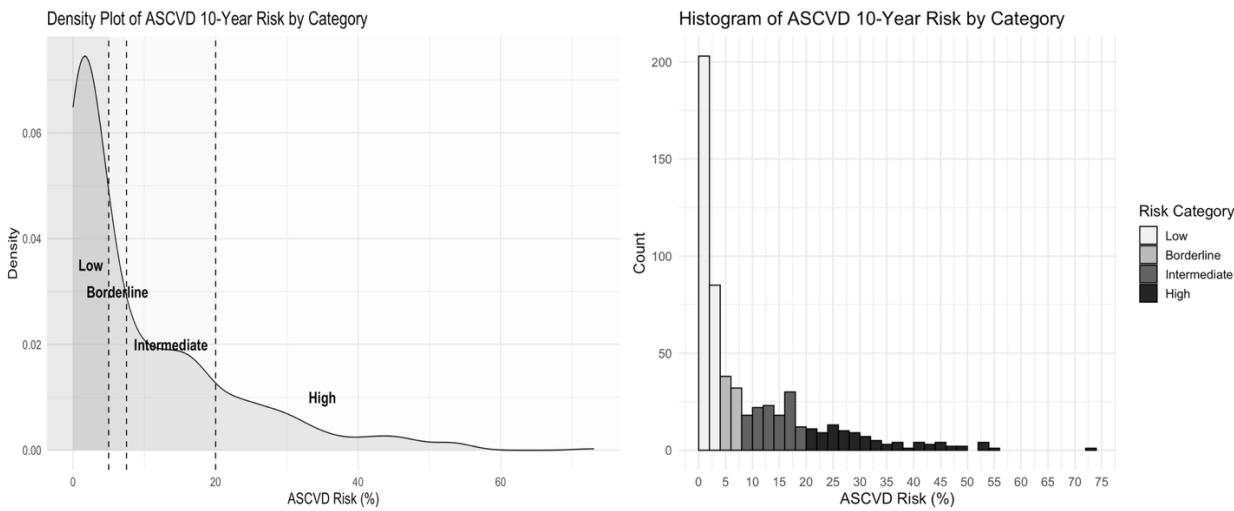

Supplementary Figure 2. Proportion of Yes vs Non-Yes by ASCVD 10-Year Risk

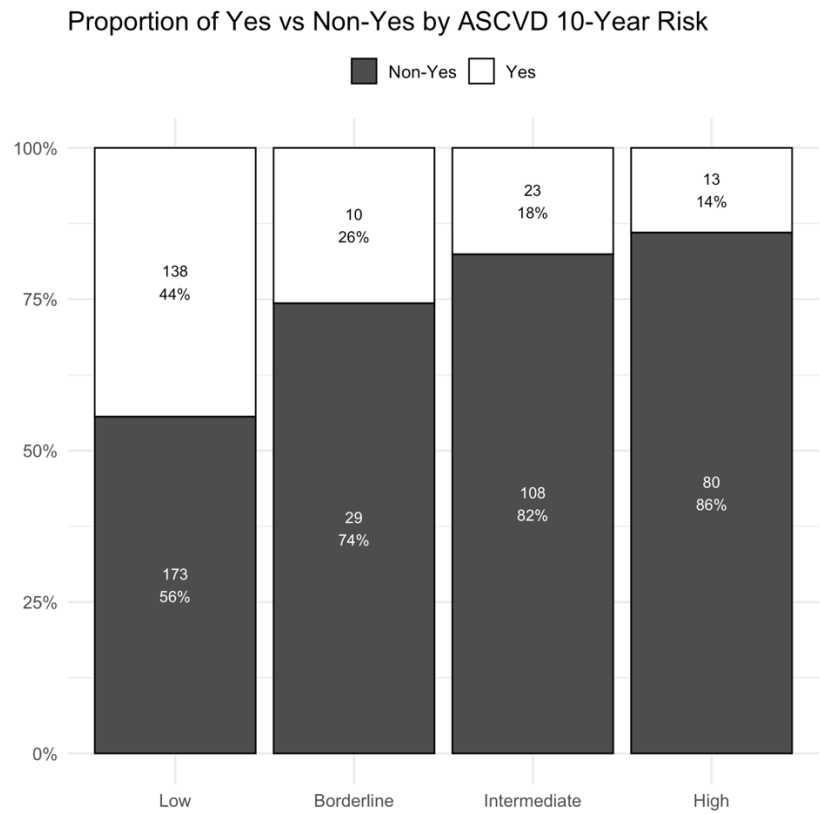

**Supplementary Table 2. Chi-square results**

| Variable                   |                                    | Awareness of CVD Risks |         | P-Value                              |
|----------------------------|------------------------------------|------------------------|---------|--------------------------------------|
|                            |                                    | Yes                    | Non-Yes |                                      |
| Individual characteristics |                                    |                        |         |                                      |
| Gender                     | Female                             | 94                     | 232     | 0.05997                              |
|                            | Male                               | 107                    | 177     |                                      |
|                            | Other gender-identified            | 1                      | 1       |                                      |
| Age                        | 11 – 20 years old                  | 0                      | 0       | 7.019e-15*<br>(0.000000000000007019) |
|                            | 21 – 30 years old                  | 27                     | 19      |                                      |
|                            | 31 – 40 years old                  | 58                     | 54      |                                      |
|                            | 41 – 50 years old                  | 39                     | 48      |                                      |
|                            | 51 – 60 years old                  | 25                     | 64      |                                      |
|                            | 61 – 70 years old                  | 14                     | 111     |                                      |
|                            | 71 – 80 years old                  | 20                     | 78      |                                      |
|                            | 81 years or older                  | 1                      | 16      |                                      |
| Race                       | White                              | 81                     | 99      | 0.002546*                            |
|                            | Black / African American           | 77                     | 208     |                                      |
|                            | Asian                              | 3                      | 3       |                                      |
|                            | American Indian / Alaska Native    | 1                      | 3       |                                      |
|                            | Native Hawaiian / Pacific Islander | 1                      | 0       |                                      |
|                            | Other identified                   | 0                      | 1       |                                      |
|                            | Do not know/unable to answer       | 0                      | 2       |                                      |
| Income                     | < \$12,999                         | 5                      | 21      | 0.0003134*                           |
|                            | \$13,000-\$24,999                  | 15                     | 36      |                                      |
|                            | \$25,000-44,999                    | 21                     | 46      |                                      |
|                            | \$45,000-64,999                    | 20                     | 80      |                                      |
|                            | \$65,000-84,999                    | 37                     | 55      |                                      |
|                            | \$85,000-104,999                   | 32                     | 42      |                                      |
|                            | \$105,000-124,000                  | 34                     | 30      |                                      |
|                            | \$125,000-144,999                  | 12                     | 24      |                                      |
|                            | > \$145,000                        | 21                     | 60      |                                      |
|                            | Do not know/ unable to answer      | 5                      | 18      |                                      |
| Education                  | Elementary or Middle School        | 2                      | 3       | 0.137                                |
|                            | General Education Development      | 9                      | 44      |                                      |

|                                            |                                 |    |     |                                    |
|--------------------------------------------|---------------------------------|----|-----|------------------------------------|
|                                            | (GED)/High School Diploma       |    |     |                                    |
|                                            | Vocational/Technical School     | 14 | 25  |                                    |
|                                            | Community College               | 26 | 59  |                                    |
|                                            | College/University (BA, BS)     | 62 | 122 |                                    |
|                                            | Graduate Degree                 | 88 | 151 |                                    |
|                                            | Do not know/unable to answer    | 0  | 3   |                                    |
| Accessibility                              |                                 |    |     |                                    |
| Primary Care Transportation Time           | Less than 15 Minutes            | 22 | 73  | 0.03912*                           |
|                                            | 15-30 minutes                   | 87 | 182 |                                    |
|                                            | 30-45 minutes                   | 63 | 96  |                                    |
|                                            | 45 minutes – 1 hour             | 23 | 41  |                                    |
|                                            | More than 1 hour                | 7  | 12  |                                    |
|                                            | Not applicable                  | 0  | 8   |                                    |
| Oncology Transportation Time               | Less than 15 Minutes            | 11 | 20  | 0.02188*                           |
|                                            | 15-30 minutes                   | 69 | 123 |                                    |
|                                            | 30-45 minutes                   | 75 | 133 |                                    |
|                                            | 45 minutes – 1 hour             | 37 | 81  |                                    |
|                                            | More than 1 hour                | 9  | 32  |                                    |
|                                            | Not applicable                  | 1  | 23  |                                    |
| Difficulty in seeing Primary Care Provider | Never                           | 43 | 176 | 4.764e-08*<br>(0.00000004764)      |
|                                            | Rarely                          | 58 | 112 |                                    |
|                                            | Sometimes                       | 56 | 76  |                                    |
|                                            | Often                           | 27 | 25  |                                    |
|                                            | Always                          | 14 | 10  |                                    |
|                                            | Not applicable                  | 1  | 12  |                                    |
| Reliable Transportation                    | Never                           | 9  | 24  | 5.781e-07*<br>(0.0000005781)       |
|                                            | Rarely                          | 9  | 13  |                                    |
|                                            | Sometimes                       | 44 |     |                                    |
|                                            | Often                           | 39 |     |                                    |
|                                            | Always                          | 99 |     |                                    |
|                                            | Not applicable                  | 1  |     |                                    |
| Transportation Method                      | Car (self-drive or have someone | 81 | 249 | 5.639e-14*<br>(0.0000000000005639) |



|                                       |                           |     |     |                                |
|---------------------------------------|---------------------------|-----|-----|--------------------------------|
|                                       | that you know drive you)  |     |     |                                |
|                                       | Uber/Lyft/Zipcar          | 35  | 16  |                                |
|                                       | Bus                       | 13  | 12  |                                |
|                                       | Train                     | 9   | 2   |                                |
|                                       | Taxi                      | 15  | 4   |                                |
|                                       | Other                     | 2   | 5   |                                |
| Cancer Survivors' Health Condition    |                           |     |     |                                |
| Hypertension                          | Yes                       | 135 | 254 | 0.4567                         |
|                                       | No                        | 64  | 151 |                                |
|                                       | I don't know              | 3   | 7   |                                |
| High Cholesterol                      | Yes                       | 102 | 223 | 0.6954                         |
|                                       | No                        | 96  | 181 |                                |
|                                       | I don't know              | 4   | 8   |                                |
| Diabetes                              | Yes                       | 63  | 106 | 0.05983                        |
|                                       | No                        | 134 | 303 |                                |
|                                       | I don't know              | 5   | 3   |                                |
| Smoking                               | Yes                       | 92  | 137 | 0.01073*                       |
|                                       | No                        | 106 | 268 |                                |
|                                       | I don't know              | 4   | 7   |                                |
| Engagement in regular health checkups |                           |     |     |                                |
| Visit to Primary Care                 | Once a year               | 36  | 104 | 2.672e-08*<br>(0.00000002672)  |
|                                       | Several times a year      | 74  | 214 |                                |
|                                       | Once a month              | 36  | 42  |                                |
|                                       | 2-4 times a month         | 46  | 39  |                                |
|                                       | More than 4 times a month | 10  | 5   |                                |
| Visit to Oncology Doctor              | Once a year               | 18  | 77  | 3.197e-06*<br>(0.000003197)    |
|                                       | Several times a year      | 77  | 193 |                                |
|                                       | Once a month              | 46  | 56  |                                |
|                                       | 2-4 times a month         | 52  | 56  |                                |
|                                       | More than 4 times a month | 8   | 7   |                                |
| ASCVD Risk                            |                           |     |     |                                |
| ASCVD Risk Category                   | Low                       | 138 | 173 | 1.306e-10*<br>(0.000000001306) |
|                                       | Borderline                | 10  | 29  |                                |
|                                       | Intermediate              | 23  | 108 |                                |
|                                       | High                      | 13  | 80  |                                |

\*Statistically significant at the 0.05 level

**Supplementary Table 3. Pruned Tree Accuracy**

| Metric                          | Value                        |
|---------------------------------|------------------------------|
| Accuracy                        | 81.08% (95% CI: 74.68–86.45) |
| No Information Rate             | 68.1%                        |
| P-value (Accuracy > NIR)        | < 0.001                      |
| Sensitivity                     | 64.4%                        |
| Specificity                     | 88.8%                        |
| Positive Predictive Value (PPV) | 73%                          |
| Negative Predictive Value (NPV) | 84.2%                        |
| Balanced Accuracy               | 76.65%                       |
| Cohen's Kappa                   | 0.5503                       |
| McNemar's Test P-value          | 0.3105                       |

**Supplementary Figure 3. ROC Curve**

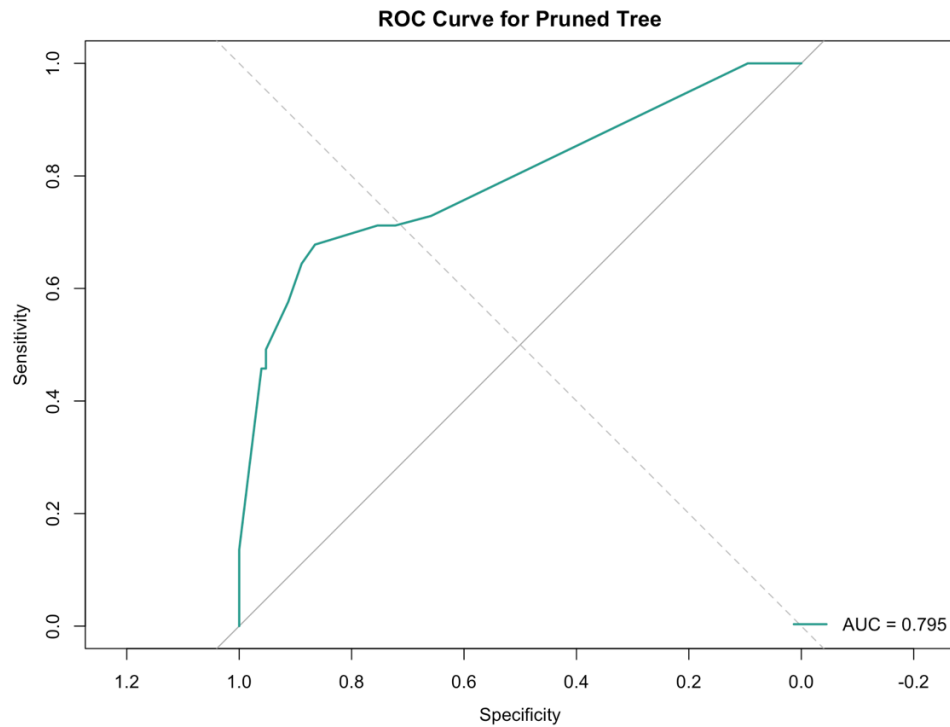

**Supplementary Figure 4. Variable Importance**

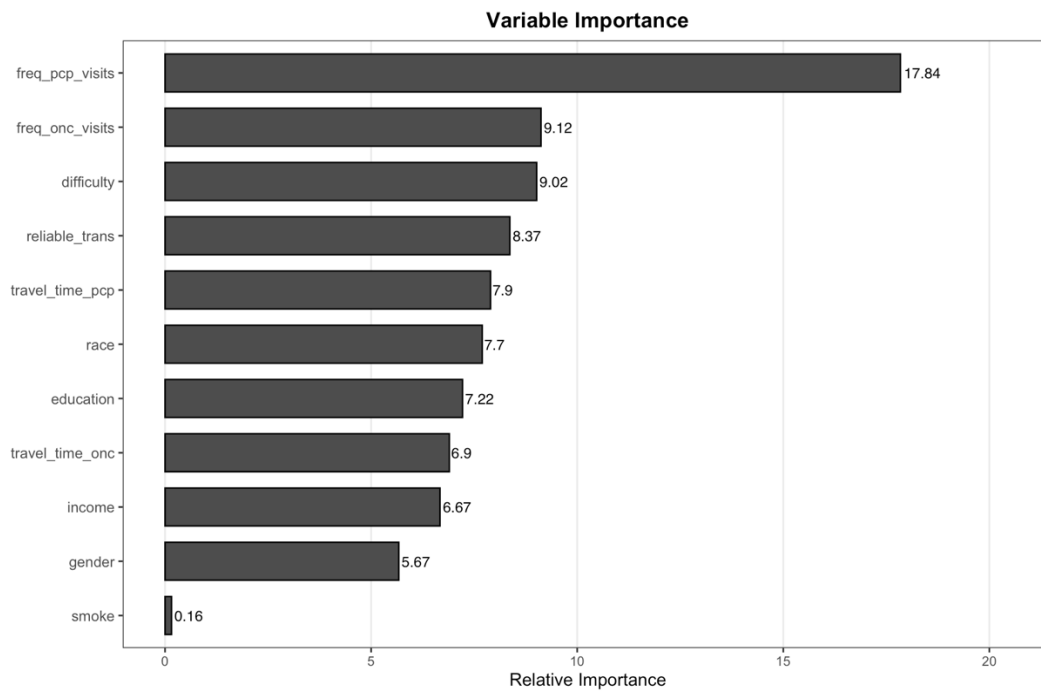

**Supplementary Figure 5. Proportion of Non-Awareness to CVD Risk by Race x Age**

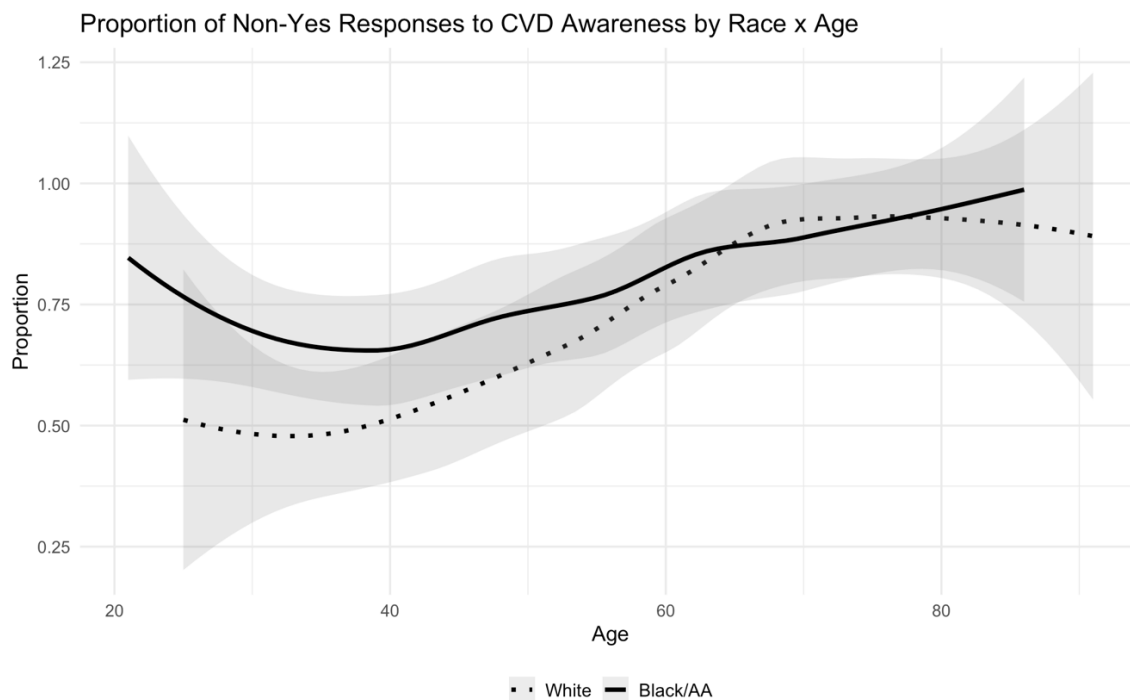

**Supplementary Figure 6. Proportion of Non-Awareness to CVD Risk by Travel Time to Primary Care x Race**

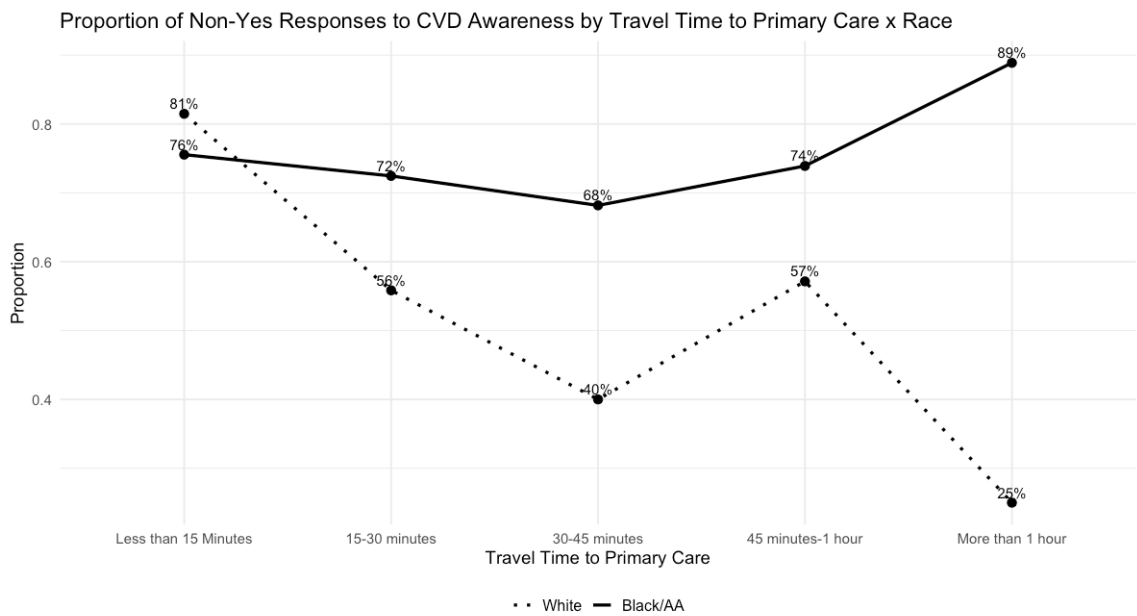

**Supplementary Figure 7. Proportion of Non-Awareness to CVD Risk by Travel Time to Oncology x Race**

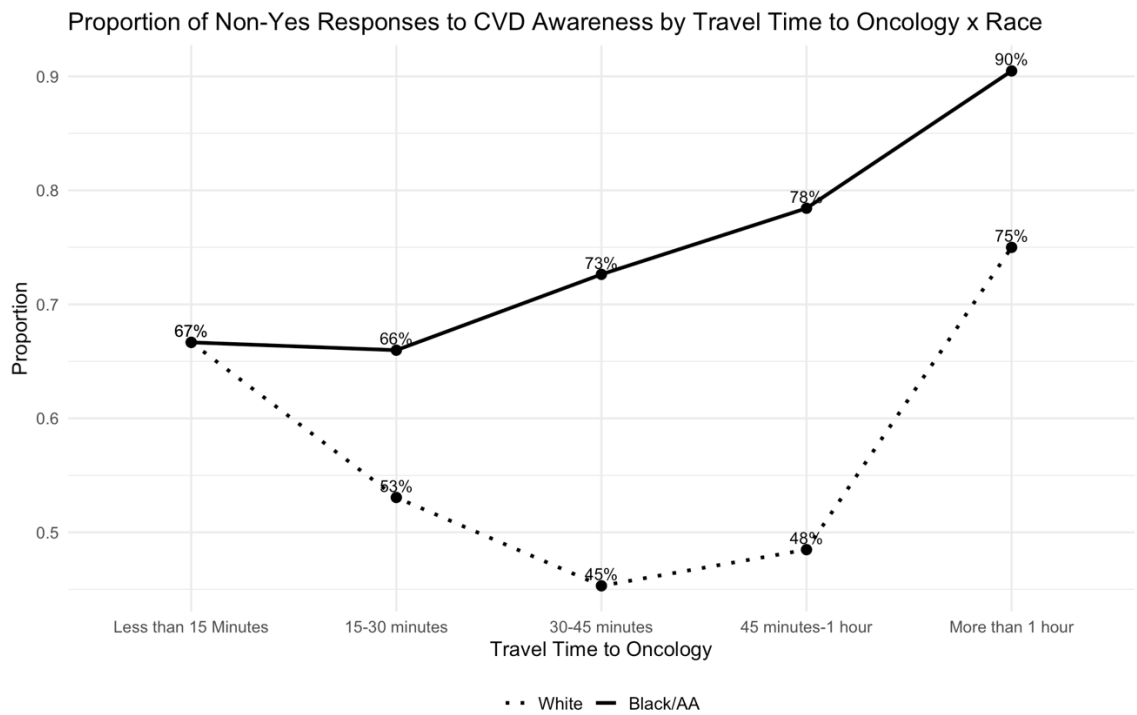

Supplement: Supplementary file 1 [file 2215e0f668450aa24034b3c4.pdf]
